# Supplementary material for: Perspectives of patients and physicians regarding hypertensive management from an online survey for excellence: a subanalysis of the PARADOX study by physician categories
Source: PubMed Central journal article supplement (PMC8075984; doi:10.1038/s41440-019-0365-9), 2020-01-29

# Supplementary Figure 3

(a)

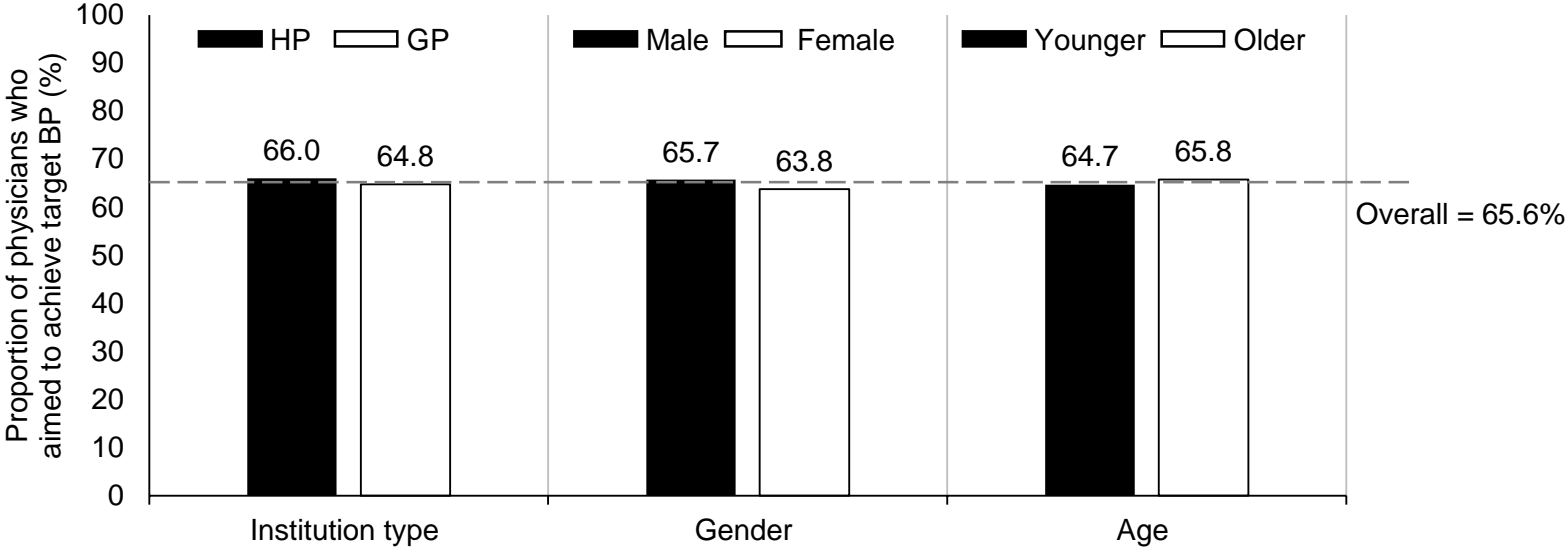

(b)

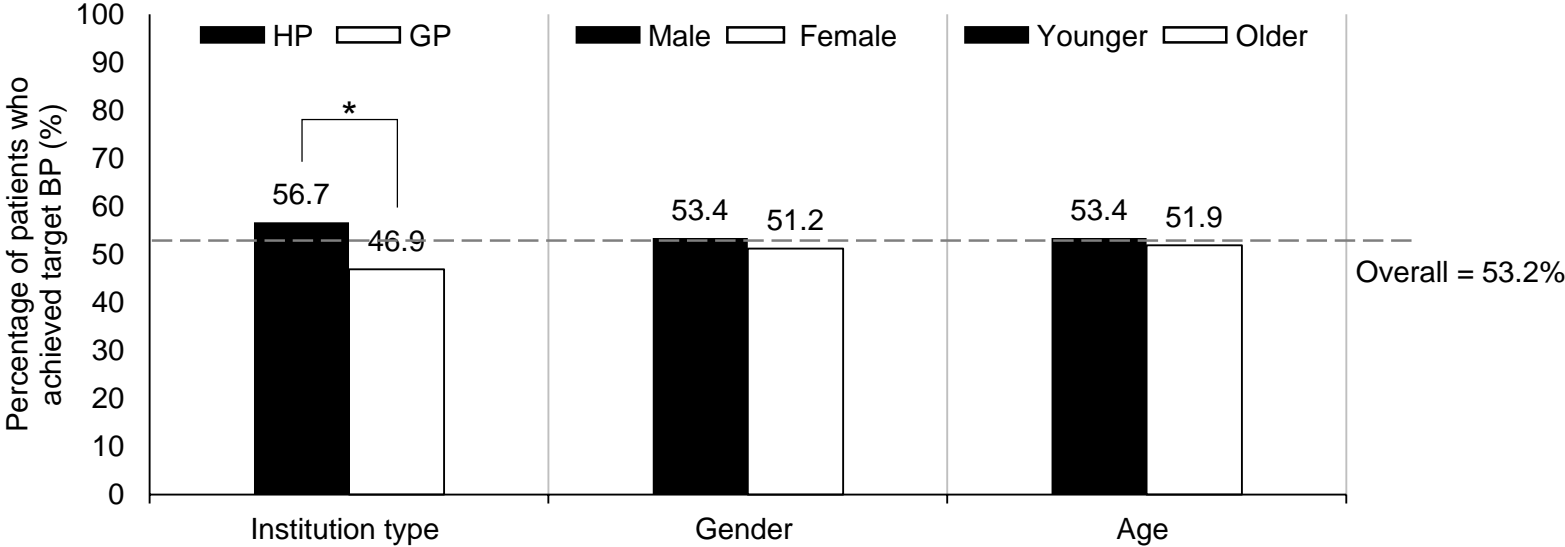

Supplement: 41440_2019_365_MOESM4_ESM.pdf [file 41440_2019_365_MOESM4_ESM.pdf]
